# Supplementary material
Source: publisher figshare collection journal article supplement (https://sage.figshare.com/ndownloader/files/23553641)
Supplement: Supplementary file 1 [file 23553641]

**REFERENCES**

These studies were included in the meta-analysis but not cited in the manuscript.

Barnhart, B. 2015. *The moderating role of perceived organizational diversity climate on the relationship between employee resource group satisfaction and work outcomes.* Unpublished master thesis, San Jose State University.

Barton, D. H. 2017. *Effect of inclusive climate on worker engagement and turnover intentions for female technology workers.* Unpublished doctoral dissertation, Northcentral University.

Bodla, A. A., Tang, N., Jiang, W., & Tian, L. 2018. Diversity and creativity in cross-national teams: The role of team knowledge sharing and inclusive climate. *Journal of Management and Organization*, 24: 711–729.

Boehm, S. A., Kunze, F., & Bruch, H. 2014. Spotlight on age-diversity climate: The impact of age-inclusive HR practices on firm-level outcomes. *Personnel Psychology*, 67: 667–704.

Bressler, L. R. 2016. *The moderating effects of organizational environment on the relationship between gender and OCB role definitions.* Unpublished master thesis, San Diego State University.

Brimhall, K. C. 2019. Inclusion is important...but how do I include? Examining the effects of leader engagement on inclusion, innovation, job satisfaction, and perceived quality of care in a diverse nonprofit health care organization. *Nonprofit and Voluntary Sector Quarterly*, 48: 716-737.

Brimhall, K. C., & Mor Barak, M. E. 2018. The critical role of workplace inclusion in fostering innovation, job satisfaction, and quality of care in a diverse human service organization. *Human Service Organizations Management, Leadership and Governance*, 42: 474–492.

Bustamante, J. 2010. *Investigating the effects of racioethnic diversity on organizational outcomes: The mediating role of social capital and the moderating role of diversity climate.* Unpublished doctoral dissertation, Columbia University.

Buttner, E. H., & Lowe, K. B. 2017. Addressing internal stakeholders’ concerns: The interactive effect of perceived pay equity and diversity climate on turnover intentions. *Journal of Business Ethics*, 143: 621–633.

Buttner, E. H., Lowe, K. B., & Billings-Harris, L. 2010. The impact of diversity promise fulfillment on professionals of color outcomes in the USA. *Journal of Business Ethics*, 91: 501–518.

Buttner, E. H., Lowe, K. B., & Billings-Harris, L. 2012. An empirical test of diversity climate dimensionality and relative effects on employee of color outcomes. *Journal of Business Ethics*, 110: 247–258.

Carstens, J. G., & De Kock, F. S. 2017. Firm-level diversity management competencies: Development and initial validation of a measure. *International Journal of Human Resource Management*, 28: 2109–2135.

Chen, C., & Tang, N. 2018. Does perceived inclusion matter in the workplace? *Journal of Managerial Psychology*, 33: 43–57.

Chen, X., Liu, D., & Portnoy, R. 2012. A multilevel investigation of motivational cultural intelligence, organizational diversity climate, and cultural sales: Evidence from U.S. real estate firms. *Journal of Applied Psychology*, 97: 93–106.

Chrobot-Mason, D., & Aramovich, N. P. 2013. The psychological benefits of creating an affirming climate for workplace diversity. *Group & Organization Management*, 38: 659–689.

Cole, B., Jones, R. J., & Russell, L. M. 2016. Racial dissimilarity and diversity climate effect organizational identification. *Equality, Diversity and Inclusion: An International Journal*, 35: 314–327.

Cole, B. M. 2013. *Psychological diversity climate and its effects: The role of organizational identification.* Unpublished doctoral dissertation, University of North Texas.

Collini, S. A. 2012. *Identifying organizational factors that moderate the engagement-turnover relationship in a healthcare setting.* Unpublished doctoral dissertation, Minnesota State University.

Daniels, S. R. 2012. *Perceptions of diversity climate and workplace incivility: Exploring their effects on employee cognition, attitudes, and behavior.* Unpublished doctoral dissertation, Tulane University.

Davies, S. E., Stoermer, S., & Froese, F. J. 2019. When the going gets tough: the influence of expatriate resilience and perceived organizational inclusion climate on work adjustment and turnover intentions. *International Journal of Human Resource Management*, 30: 1393-1417.

Dhanesh, G., & Duthler, G. 2017. *CSR and public relations in the Middle East: Relationships among diversity climate, perceptions of CSR and employee engagement.* Unpublished working paper, Dubai, United Arab Emirates.

Dwertmann, D. J. G., & Boehm, S. A. 2016. Status matters: The asymmetric effects of supervisor-subordinate disability incongruence and climate for inclusion. *Academy of Management Journal*, 59:1–21.

Ely, R. J., Padavic, I., & Thomas, D. A. 2012. Racial diversity, racial asymmetries, and team learning environment: Effects on performance. *Organization Studies*, 33: 341–362.

Guchait, P., Madera, J., & Dawson, M. 2016. Learning in the service environment: The influence of diversity climate. *Journal of Service Theory and Practice*, 26: 448–470.

Guerrero, S., Sylvestre, J., & Muresanu, D. 2013. Pro-diversity practices and perceived insider status. *Cross Cultural Management: An International Journal*, 20: 5–19.

Hankins, K. A. 2005. *The influence of diversity climate on perceived organizational support and job satisfaction.* Unpublished doctoral dissertation, Capella University.

Hedman, B. K. 2016. *Developing a measure of inclusiveness: Factors, reliability, and relationship to job satisfaction and intention to quit.* Unpublished doctoral dissertation, University of Denver.

Herres, D. 2013. *Working in the gay front line: A model of workplace heterosexist harassment.* Unpublished master thesis, University of Connecticut.

Hicks-Clarke, D., & Iles, P. 2000. Climate for diversity and its effects on career and organisational attitudes and perceptions. *Personnel Review*, 29: 324–345.

Hobman, E. V., Bordia, P., & Gallois, C. 2004. Perceived dissimilarity and work group involvement: The moderating effects of group openness to diversity. *Group & Organization Management*, 29: 560–587.

Holmes IV, O., Tillman, C. J., & Lawrence, E. R. 2013. An emotional rollercoaster: The relationship between diversity climate, conflict and emotional exhaustion. *Annual Meetings of the Southern Management Association*. New Orleans, LA.

Houkamau, C., & Boxall, P. 2011. The incidence and impacts of diversity management: A survey of New Zealand employees. *Asia Pacific Journal of Human Resources*, 49: 440–460.

Huettermann, H., Kunze, F., & Bruch, H. 2015. Promoting diversity climate in organizations: The interplay of organizational LMX quality and top management leadership. *Academy of Management Proceedings*.

Jagusztyn, N. E. 2010. *Perceived workplace discrimination as a mediator between work environment and employee outcomes: Does minority status matter?* Unpublished doctoral dissertation, University of South Florida.

Jauhari, H., & Singh, S. 2013. Perceived diversity climate and employees’ organizational loyalty. *Equality, Diversity and Inclusion: An International Journal*, 32: 262–276.

Kundu, S. C., & Mor, A. 2017. Workforce diversity and organizational performance: A study of IT industry in India. *Employee Relations*, 39: 160–183.

Kunze, F., Boehm, S. A., & Bruch, H. 2011. Age diversity, age discrimination climate and performance consequences-a cross organizational study. *Journal of Organizational Behavior*, 32: 264–290.

Kunze, F., Boehm, S. A., & Bruch, H. 2013. Organizational performance consequences of age diversity: Inspecting the role of diversity-friendly HR policies and top managers’ negative age stereotypes. *Journal of Management Studies*, 50: 413–442.

Lauring, J., & Selmer, J. 2011. Multicultural organizations: Does a positive diversity climate promote performance? *European Management Review*, 8: 81–93.

Le, H., Jiang, Z., Fujimoto, Y., & Nielsen, I. 2018. Inclusion and affective well-being: roles of justice perceptions. *Personnel Review*, 47: 805–820.

Lee, J. W., Zhang, L., Dallas, M., & Chin, H. 2019. Managing relational conflict in Korean social enterprises: The role of participatory HRM practices, diversity climate, and perceived social impact. *Business Ethics*, 28: 19–35.

Li, C., Lin, C., Tien, Y., & Chen, C. 2017. A multilevel model of team cultural diversity and creativity: The role of climate for inclusion. *Journal of Creative Behavior*, 51: 163–179.

Li, J., Zhu, X., Li, X., Cattopadhyay, P., & George, E. 2017. Gain or pain: How disability severity affects the impact of climate for inclusion. *The Academy of Management Conference Proceedings*. Atlanta, GA.

Li, Y., Perera, S., Kulik, C. T., & Metz, I. 2019. Inclusion climate: A multilevel investigation of its antecedents and consequences. *Human Resource Management*, 58: 353-369.

Lingard, H., & Lin, J. 2004. Career, family and work environment determinants of organizational commitment among women in the Australian construction industry. *Construction Management and Economics*, 22: 409–420.

Luu, T. 2019. Relationship between benevolent leadership and the well-being among employees with disabilities. *Journal of Business Research*, 99: 282–294.

Luu, T. T. 2019. Can diversity climate shape service innovative behavior in Vietnamese and Brazilian tour companies? The role of work passion. *Tourism Management*, 72: 326–339.

Madera, J. M., King, E. B., & Hebl, M. R. 2013. Enhancing the effects of sexual orientation diversity training: The effects of setting goals and training mentors on attitudes and behaviors. *Journal of Business and Psychology*, 28: 79–91.

McKay, P. F., Avery, D. R., & Morris, M. A. 2009. A tale of two climates: Diversity climate from subordinates and managers perspectives and their role in store unit sales performance. *Personnel Psychology*, 62: 767–791.

McKay, P. F., Avery, D. R., Son, E., Rosado-Solomon, E., & Pustovit, S. 2017. Can cooperation help explain the demographic diversity-business performance relationship? *The Academy of Management Conference Proceedings*. Atlanta, GA.

Menassa, J. 2007. *Valuing diversity: An examination of diversity climate, work attitudes, and employee racioethnicities.* Unpublished master thesis, Concordia University.

Moon, K. 2018a. Examining the relationships between diversity and work behaviors in U.S. federal agencies: Does inclusive management make a difference? *Review of Public Personnel Administration*, 38: 218–247.

Moon, K. 2018b. How does a diversity climate shape the relationship between demographic diversity and organizational social capital in the U.S. federal government? *Public Management Review*, 20: 1246–1264.

Nag, M. 2011. *Psychological climate for diversity: Antecedents and outcomes.* Unpublished master thesis, University of Maryland.

Newman, A., Nielsen, I., Smyth, R., Hirst, G., & Kennedy, S. 2018. The effects of diversity climate on the work attitudes of refugee employees: The mediating role of psychological capital and moderating role of ethnic identity. *Journal of Vocational Behavior*, 105:147–158.

Paez, K. N. 2006. *Diversity awareness, diversity climate, and individual career outcomes: A counseling psychology perspective.* Unpublished doctoral dissertation, University of Oregon.

Paolillo, A., Pasini, M., Silva, S. A., & Magnano, P. 2017. Psychometric properties of the Italian adaptation of the Mor Barak et al. diversity climate scale. *Quality and Quantity*, 51: 873–890.

Paolillo, A., Silva, S. A., & Pasini, M. 2016. Promoting safety participation through diversity and inclusion climates. *International Journal of Workplace Health Management*, 9: 308–327.

Parks, K. M., Crepeau, L. J., Knouse, S. B., & McDonald, D. P. 2008. Latina perceptions of diversity climate in the military. *Business Journal of Hispanic Research*, 2: 48–61.

Phouthonephackdy, T. 2016. *Diversity climate perceptions and employee turnover intentions: The importance of racial group identification.* Unpublished master thesis, University of Waterloo.

Randel, A. E., Dean, M. A., Ehrhart, K. H., Chung, B., & Shore, L. 2016. Leader inclusiveness, psychological diversity climate, and helping behaviors. *Journal of Managerial Psychology*, 31: 216–234.

Reinwald, M., Huettermann, H., & Bruch, H. 2019. Beyond the mean: Understanding firm-level consequences of variability in diversity climate perceptions. *Journal of Organizational Behavior*, 40: 472–491.

Richard, O. C., Avery, D. R., Luksyte, A., Boncoeur, O. D., & Spitzmueller, C. 2019. Improving organizational newcomers’ creative job performance through creative process engagement: The moderating role of a synergy diversity climate. *Personnel Psychology*, 72: 421-444.

Rineer, J. R. 2015. *Supporting the aging workforce: The impact of psychosocial workplace characteristics on employees’ work ability.* Unpublishe doctoral dissertation, Portland State University.

Rodriguez, J. 2018. *Inclusive leadership and employee engagement: The moderating effect of psychological diversity climate.* Unpublished master thesis, California State University-San Bernardino.

Rosado-Solomon, E. 2017. *Examining the relationship between gender and well-being.* Unpublished master thesis, Rutgers, The State University of New Jersey.

Şahin, O., van der Toorn, J., Jansen, W. S., Boezeman, E. J., & Ellemers, N. 2019. Looking beyond our similarities: How perceived (in)visible dissimilarity relates to feelings of inclusion at work. *Frontiers in Psychology*, 10: 1–13.

Settles, I. H., & O’Connor, R. C. 2014. Incivility at academic conferences: Gender differences and the mediating role of climate. *Sex Roles*, 71: 71–82.

Settles, I. H., & O’Connor, R. C. 2014. Incivility at academic conferences: Gender differences and the mediating role of climate. *Sex Roles*, 71: 71–82.

Sharif, M. M. 2014. *Immigrant diversity and host country acculturation in leader-member dyads.* Unpublished doctoral dissertation, University of Miami.

Singh, B., & Selvarajan, T. T. 2013. Is it spillover or compensation? Effects of community and organizational diversity climates on race differentiated employee intent to stay. *Journal of Business Ethics*, 115: 259–269.

Singh, B., Winkel, D. E., & Selvarajan, T. T. 2013. Managing diversity at work: Does psychological safety hold the key to racial differences in employee performance? *Journal of Occupational and Organizational Psychology*, 86: 242–263.

Sliter, M., Boyd, E., Sinclair, R., Cheung, J., & McFadden, A. 2014. Inching toward inclusiveness: Diversity climate, interpersonal conflict and well-being in women nurses. *Sex Roles*, 71: 43–54.

Stewart, R. W., Volpone, S. D., Avery, D. R., & McKay, P. 2011. You support diversity, but are you ethical? Examining the interactive effects of diversity and ethical climate perceptions on turnover intentions. *Journal of Business Ethics*, 100: 581–593.

Taylor, A. S. 2011. *Toward a taxonomy of diversity at work: Developing and validating the workplace diversity inventory.* Unpublished master thesis, Portland State University.

Taylor, A. S. 2015. *Transformational leadership, diversity, and creativity at work: A moderated mediation model.* Unpublished doctoral dissertation, Portland State University.

Tenglund, A. 2000. *Effects of gender and ethnic identity on perceptions of diversity and fairness: Exploring the importance of identity in organizational behavior.* Unpublished doctoral dissertation, University of Delaware.

Trau, R. N. C. 2015. The impact of discriminatory climate perceptions on the composition of intraorganizational development networks, psychosocial support, and job and career attitudes of employees with an invisible stigma. *Human Resource Management*, 54: 345–366.

Tuan, L. T., Rowley, C., & Vo, T. T. 2019. Addressing employee diversity to foster their work engagement. *Journal of Business Research*, 95: 303–315.

Veldman, J., Meeussen, L., Van Laar, C., & Phalet, K. 2017. Women (do not) belong here: Gender-work identity conflict among female police officers. *Frontiers in Psychology*, 8: 1–12.

Victorino, C. A., Nylund-Gibson, K., & Conley, S. 2013. Campus racial climate: A litmus test for faculty satisfaction at four-year colleges and universities. *Journal of Higher Education*, 84: 769–803.

Walsh, B. M., Matthews, R. A., Tuller, M. D., Parks, K. M., & McDonald, D. P. 2010. A multilevel model of the effects of equal opportunity climate on job satisfaction in the military. *Journal of Occupational Health Psychology*, 15: 191–207.

Wessel, J. L., & Ryan, A. M. 2012. Supportive when not supported? Male responses to negative climates for women. *Sex Roles*, 66: 94–104.

Wolfson, N., Kraiger, K., & Finkelstein, L. 2011. The relationship between diversity climate perceptions and workplace attitudes. *The Psychologist-Manager Journal*, 14: 161–176.

Zacher, H., & Yang, J. 2016. Organizational climate for successful aging. *Frontiers in Psychology*, 7: 1–12.

Bibliography

(J. Li, Zhu, Li, Cattopadhyay, & George, 2017; McKay, Avery, Son, Rosado-Solomon, & Pustovit, 2017; Paolillo, Pasini, Silva, & Magnano, 2017; Phouthonephackdy, 2016; Trau, 2015; Veldman, Meeussen, Van Laar, & Phalet, 2017)(Newman, Nielsen, Smyth, Hirst, & Kennedy, 2018; Rosado-Solomon, 2017)(B. Cole, Jones, & Russell, 2016; Dhanesh & Duthler, 2017)(Bustamante, 2010) (Buttner, Lowe, & Billings-Harris, 2010, 2012) (X. Chen, Liu, & Portnoy, 2012) (Chrobot-Mason & Aramovich, 2013) (Collini, 2012)(Daniels, 2012) (Dwertmann & Boehm, 2016) (Ely, Padavic, & Thomas, 2012) (Guchait, Madera, & Dawson, 2016) (Guerrero, Sylvestre, & Muresanu, 2013) (Hankins, 2005) (Herres, 2013) (Hicks-Clarke & Iles, 2000) (Hobman, Bordia, & Gallois, 2004) (Holmes IV, Tillman, & Lawrence, 2013) (Houkamau & Boxall, 2011) (Huettermann, Kunze, & Bruch, 2015) (Jagusztyn, 2010) (Kunze, Boehm, & Bruch, 2013) (Lauring & Selmer, 2011) (Lingard & Lin, 2004) (Madera, King, & Hebl, 2013) (Menassa, 2007) (Nag, 2011) (Randel, Dean, Ehrhart, Chung, & Shore, 2016) (Settles & O’Connor, 2014) (Singh & Selvarajan, 2013) (Singh, Winkel, & Selvarajan, 2013) (Sliter, Boyd, Sinclair, Cheung, & McFadden, 2014) (Stewart, Volpone, Avery, & McKay, 2011) (Taylor, 2011) (Victorino, Nylund-Gibson, & Conley, 2013) (Virick & Greer, 2012) (Volpone, 2013) (Walsh, Matthews, Tuller, Parks, & McDonald, 2010) (Wessel & Ryan, 2012) (Wolfson, Kraiger, & Finkelstein, 2011)

(Barnhart, 2015; Barton, 2017; Bodla, Tang, Jiang, & Tian, 2018; Bressler, 2016; Brimhall, 2019; Brimhall & Mor Barak, 2018; Carstens & De Kock, 2017; C. Chen & Tang, 2018; Chung et al., 2019; B. M. Cole, 2013; Davies, Stoermer, & Froese, 2019; Hedman, 2016; Kundu & Mor, 2017; Le, Jiang, Fujimoto, & Nielsen, 2018; Lee, Zhang, Dallas, & Chin, 2019; C. Li, Lin, Tien, & Chen, 2017; Y. Li, Perera, Kulik, & Metz, 2019; T. Luu, 2019; T. T. Luu, 2019; Moon, 2018a, 2018b; Reinwald, Huettermann, & Bruch, 2019; Richard, Avery, Luksyte, Boncoeur, & Spitzmueller, 2019; Rineer, 2015; Rodriguez, 2018; Şahin, van der Toorn, Jansen, Boezeman, & Ellemers, 2019; Sharif, 2014; Taylor, 2015; Zacher & Yang, 2016)(Buttner & Lowe, 2017)(Paez, 2006)(Tenglund, 2000)(Tuan, Rowley, & Vo, 2019)
